# Supplementary material
Source: publisher figshare collection journal article supplement (https://karger.figshare.com/ndownloader/files/25037651)
Supplement: Supplementary file 1 [file 25037651]

**Supplementary Table S1. Patients' characteristics in the esophageal and colorectal cancer cohorts**

| <b>EC cohort</b>                    | <b>HC<br/>(n=90)</b> | <b>EC<br/>(n=25)</b>  | <b><i>P</i> value</b> |
|-------------------------------------|----------------------|-----------------------|-----------------------|
| Median age [IQR] (years)            | 70 [62–74]           | 69 [65–76]            | 0.721 <sup>†</sup>    |
| Sex                                 |                      |                       |                       |
| Female                              | 8 (8.9%)             | 2 (8.0%)              | 1.000 <sup>§</sup>    |
| Male                                | 82 (91.1%)           | 23 (92.0%)            |                       |
| Median serum Cr [IQR] (mg/dl)       | 0.85 [0.77–0.95]     | 0.84 [0.76–0.96]      | 0.822 <sup>†</sup>    |
| Stage                               |                      |                       |                       |
| I                                   |                      | 13 (52.0%)            |                       |
| II                                  |                      | 3 (12.0%)             |                       |
| III                                 |                      | 4 (16.0%)             |                       |
| IV                                  |                      | 5 (20.0%)             |                       |
| Histological type                   |                      |                       |                       |
| Adenocarcinoma (well to moderately) |                      | 3 (12.0%)             |                       |
| Adenocarcinoma (poorly)             |                      | 1 (4.0%)              |                       |
| SCC (well to moderately)            |                      | 20 (80.0%)            |                       |
| SCC (poorly)                        |                      | 1 (4.0%)              |                       |
| T stage                             |                      |                       |                       |
| T1                                  |                      | 15 (60.0%)            |                       |
| T2                                  |                      | 1 (4.0%)              |                       |
| T3                                  |                      | 5 (20.0%)             |                       |
| T4                                  |                      | 4 (16.0%)             |                       |
| <b>CRC cohort</b>                   | <b>HC<br/>(n=92)</b> | <b>CRC<br/>(n=96)</b> | <b><i>P</i> value</b> |
| Median age [IQR] (years)            | 69 [66–74]           | 72 [64–78]            | 0.115 <sup>†</sup>    |
| Sex                                 |                      |                       | 0.851 <sup>‡</sup>    |
| Female                              | 39 (42.4%)           | 42 (43.8%)            |                       |
| Male                                | 53 (57.6%)           | 54 (56.3%)            |                       |
| Median serum Cr [IQR] (mg/dl)       | 0.78 [0.67–0.87]     | 0.73 [0.63–0.87]      | 0.212 <sup>†</sup>    |
| Stage                               |                      |                       |                       |
| 0                                   |                      | 17 (17.7%)            |                       |
| I                                   |                      | 14 (14.6%)            |                       |
| II                                  |                      | 20 (20.8%)            |                       |
| III                                 |                      | 21 (21.9%)            |                       |
| IV                                  |                      | 24 (25.0%)            |                       |
| Histological type                   |                      |                       |                       |
| Differentiated                      |                      | 86 (89.6%)            |                       |
| Undifferentiated                    |                      | 10 (10.4%)            |                       |
| T stage                             |                      |                       |                       |
| Tis                                 |                      | 17 (17.7%)            |                       |
| T1                                  |                      | 10 (10.4%)            |                       |
| T2                                  |                      | 6 (6.3%)              |                       |
| T3                                  |                      | 39 (40.6%)            |                       |
| T4                                  |                      | 24 (25%)              |                       |

<sup>†</sup>, Mann-Whitney U test

<sup>‡</sup>, the  $\chi^2$  test

<sup>§</sup>, Fisher's exact probability test

HC, healthy control; EC, esophageal cancer; CRC, colorectal cancer; IQR, interquartile range; Cr, creatinine; Differentiated, well to moderately differentiated adenocarcinoma; Undifferentiated, poorly differentiated adenocarcinoma

**Supplementary Table S2. Serum exosomal Dicer in the gastrointestinal cancer**

|                   | Serum exosomal Dicer (ng/ml)<br>Median [IQR] |               | <i>P</i> value     |
|-------------------|----------------------------------------------|---------------|--------------------|
|                   | HC                                           | Cancer        |                    |
| <b>GC cohort</b>  | 196.4                                        | 206.0         | 0.004 <sup>†</sup> |
|                   | [173.0–218.1]                                | [192.7–220.5] |                    |
| <b>EC cohort</b>  | 191.4                                        | 196.9         | 0.576 <sup>†</sup> |
|                   | [173.4–205.5]                                | [182.4–205.7] |                    |
| <b>CRC cohort</b> | 191.2                                        | 199.0         | 0.432 <sup>†</sup> |
|                   | [174.2–213.9]                                | [173.6–222.0] |                    |

<sup>†</sup>, Mann-Whitney U test

IQR, interquartile range

HC, healthy control; GC, gastric cancer, EC, esophageal cancer; CRC, colorectal cancer

**Supplementary Table S3. Serum exosomal Dicer of whole stage I gastric cancer cohort**

|                                     | Median [IQR]  |               | <i>P</i> value     |
|-------------------------------------|---------------|---------------|--------------------|
|                                     | HC            | Stage I GC    |                    |
| <b>Serum exosomal Dicer (ng/ml)</b> | 196.4         | 204.7         | 0.010 <sup>†</sup> |
|                                     | [173.0–218.1] | [193.2–220.6] |                    |

<sup>†</sup>, Mann-Whitney U test

IQR, interquartile range; HC, healthy control; GC, gastric cancer

**Supplementary Table S4. Serum exosomal Dicer of stage I differentiated gastric cancer cohort**

|                                     | Median [IQR]  |                              | <i>P</i> value     |
|-------------------------------------|---------------|------------------------------|--------------------|
|                                     | HC            | Stage I<br>differentiated GC |                    |
| <b>Serum exosomal Dicer (ng/ml)</b> | 196.4         | 204.7                        | 0.011 <sup>†</sup> |
|                                     | [173.0–218.1] | [192.9–221.9]                |                    |

<sup>†</sup>, Mann-Whitney U test

IQR, interquartile range; HC, healthy control; GC, gastric cancer

**Supplementary Table S5. Diagnostic power of each biomarker**

| <b>Whole stage differentiated GC</b>           | <b>Sensitivity</b> | <b>Specificity</b> | <b>AUC [95% CI]</b>    |
|------------------------------------------------|--------------------|--------------------|------------------------|
| <b>CEA</b>                                     | 8.5% (6/71)        | 86.7% (78/90)      | 0.497<br>[0.406-0.588] |
| <b>CA19-9</b>                                  | 19.7% (14/71)      | 88.9% (80/90)      | 0.576<br>[0.485-0.667] |
| <b>Serum exosomal Dicer + <i>H. pylori</i></b> | 77.5% (55/71)      | 62.2% (56/90)      | 0.762<br>[0.689-0.835] |
| <b>Stage I differentiated GC</b>               | <b>Sensitivity</b> | <b>Specificity</b> | <b>AUC [95% CI]</b>    |
| <b>CEA</b>                                     | 3.5% (2/57)        | 86.7% (78/90)      | 0.473<br>[0.377-0.569] |
| <b>CA19-9</b>                                  | 12.3% (7/57)       | 88.9% (80/90)      | 0.533<br>[0.435-0.631] |
| <b>Serum exosomal Dicer + <i>H. pylori</i></b> | 71.9% (41/57)      | 62.2% (56/90)      | 0.758<br>[0.678-0.838] |

GC, gastric cancer; *H. pylori*, *Helicobacter pylori*; AUC, area under the curve; 95% CI, 95% confidence interval; CEA, carcinoembryonic antigen; CA19-9, cancer antigen 19-9.

Cut-off values for GC: CEA >5.0 ng/ml; CA19-9 >37.0 U/ml

**Supplementary Table S6. Internal cross-validation of serum exosomal Dicer + *H. pylori***

|                                  | <b>Training set<br/>AUC [95 % CI]</b> | <b>Test set<br/>AUC [95% CI]</b> |
|----------------------------------|---------------------------------------|----------------------------------|
| <b>Differentiated GC</b>         | 0.761 [0.617-0.872]                   | 0.749 [0.732-0.792]              |
| <b>Stage I differentiated GC</b> | 0.758 [0.729-0.788]                   | 0.756 [0.629-0.873]              |

GC, gastric cancer; AUC, area under the curve; 95% CI, 95% confidence interval
